# Supplementary material for: BcMettl4-Mediated DNA Adenine N6-Methylation Is Critical for Virulence of Botrytis cinerea
Source: Front Microbiol. 2022 Jun 30;13:925868. doi: 10.3389/fmicb.2022.925868 (PMC9279130; doi:10.3389/fmicb.2022.925868)
Supplement: Supplementary file 6 [file Table_6.XLSX]

## Sheet: Table S6
Table S6. The downregulated genes.
id	baseMean	baseMeanA	baseMeanB	foldChange	log2FoldChange	pval	padj	Name	locus_tag	old_locus_tag
gene4151	1240.33	2027.63	453.025	0.223426	-2.16213	1.16732e-17	5.17573e-15	BCIN_05g04180	BC1G_01368	-
gene718	216.262	340.17	92.3538	0.271493	-1.88101	2.16929e-11	3.29047e-09	BCIN_01g07210	BC1G_00245	-
gene5767	2555.72	3660.34	1451.11	0.396441	-1.33482	2.84894e-08	2.62741e-06	BCIN_07g04290	BC1G_07284	-
gene1268	6811.24	9725.77	3896.71	0.400658	-1.31956	3.93266e-08	3.56974e-06	BCIN_02g01010	BC1G_05616	-
gene2534	435.999	647.25	224.749	0.347236	-1.52601	6.7083e-08	5.82359e-06	BCIN_03g04310	BC1G_00689	-
gene7367	6238.84	9381.43	3096.26	0.330041	-1.59928	7.29424e-08	6.27523e-06	BCIN_09g06110	BC1G_09443	-
gene7950	114.862	172.501	57.2222	0.33172	-1.59196	1.79905e-07	1.49205e-05	BCIN_10g04810	BC1G_03639	-
gene11254	69.1893	107.576	30.8031	0.286339	-1.8042	2.20081e-07	1.77959e-05	BCIN_16g01120	BC1G_10407	-
gene969	890.043	1281.47	498.614	0.389095	-1.3618	3.18824e-07	2.43405e-05	BCIN_01g09720	BC1G_15423	-
gene5613	192.62	277.566	107.674	0.387923	-1.36616	8.87601e-07	5.6837e-05	BCIN_07g02750	BC1G_02728	-
gene7036	4429.44	6141.5	2717.37	0.442461	-1.17638	9.08912e-07	5.75711e-05	BCIN_09g02790	BC1G_07090	-
gene1651	10825.3	14952.9	6697.61	0.447914	-1.15871	1.39384e-06	8.51556e-05	BCIN_02g04840	BC1G_08663	-
gene5513	73.1353	109.537	36.7339	0.335357	-1.57623	2.55225e-06	0.000144227	BCIN_07g01750	BC1G_15659	-
gene6455	4112	5817.04	2406.97	0.413779	-1.27307	4.17708e-06	0.000219879	BCIN_08g04070	BC1G_07573	-
gene8347	1976.57	2722.93	1230.2	0.451794	-1.14626	4.55355e-06	0.000238606	BCIN_11g02520	BC1G_04764	-
gene3524	63.1208	111.663	14.5782	0.130554	-2.93728	5.85168e-06	0.000297173	BCIN_04g04880	BC1G_04238	-
gene814	112.349	161.828	62.8703	0.388501	-1.36401	6.90854e-06	0.000346268	BCIN_01g08170	BC1G_00100	-
gene9088	237.203	332.067	142.34	0.428648	-1.22213	7.03243e-06	0.000350952	BCIN_12g03390	BC1G_08755	-
gene5815	696.765	1054.83	338.705	0.3211	-1.6389	7.31303e-06	0.000358743	BCIN_07g04770	BC1G_07220	-
gene7724	2743.5	3900.49	1586.52	0.406749	-1.29779	7.73038e-06	0.000375702	BCIN_10g02550	BC1G_04706	-
gene7265	95.5844	154.327	36.8422	0.238729	-2.06655	8.64824e-06	0.000408594	BCIN_09g05090	BC1G_09869	-
gene5996	993.345	1351.68	635.01	0.469793	-1.0899	9.17731e-06	0.00043182	BCIN_07g06590	BC1G_15786	-
gene6064	512.806	701.664	323.949	0.461687	-1.11501	1.07575e-05	0.000490169	BCIN_08g00140	BC1G_14569	-
gene4830	3729.54	5045.23	2413.85	0.478441	-1.06359	1.39088e-05	0.000609661	BCIN_06g02530	BC1G_01289	-
gene9269	672.464	913.704	431.223	0.47195	-1.08329	1.52894e-05	0.000658033	BCIN_12g05200	BC1G_07410	-
gene6892	4976.19	7096.58	2855.8	0.40242	-1.31323	1.83612e-05	0.000766915	BCIN_09g01320	BC1G_13616	-
gene10477	855.567	1153.31	557.827	0.483676	-1.04789	2.1862e-05	0.000878137	BCIN_14g04670	BC1G_15352	-
gene2663	3652.13	5170.81	2133.45	0.412594	-1.2772	2.6487e-05	0.00103156	BCIN_03g05600	BC1G_00879	-
gene974	294.375	400.692	188.058	0.469334	-1.09131	2.941e-05	0.00113013	BCIN_01g09770	BC1G_15430	-
gene9395	23.8696	38.3956	9.34361	0.243351	-2.03889	3.04113e-05	0.00115704	BCIN_12g06440	BC1G_13837	-
gene8136	219.202	300.76	137.644	0.457652	-1.12768	3.43289e-05	0.00129328	BCIN_11g00410	BC1G_09643	-
gene3391	1275.46	1703.94	846.982	0.497073	-1.00847	4.02921e-05	0.00146065	Bcstc4	BCIN_04g03550	BC1G_14308
gene6538	142.007	196.568	87.4454	0.444861	-1.16857	6.63889e-05	0.00219923	BCIN_08g04900	BC1G_08846	-
gene10898	13920.9	20399.6	7442.31	0.364827	-1.45471	7.51574e-05	0.00242957	BCIN_15g03320	BC1G_02965	-
gene5082	83.578	117.011	50.1445	0.428544	-1.22249	0.000107332	0.00325612	BCIN_06g05050	BC1G_02333	-
gene7176	139.766	192.542	86.9901	0.451798	-1.14625	0.000116147	0.00344202	BCIN_09g04200	BC1G_12175	-
gene4382	129.766	178.948	80.585	0.450327	-1.15096	0.000124754	0.00365944	BCIN_05g06500	BC1G_01720	-
gene8739	189.084	254.56	123.609	0.485577	-1.04223	0.000148617	0.00419982	BCIN_11g06460	BC1G_12855	-
gene9847	415.63	729.28	101.981	0.139838	-2.83817	0.000152185	0.00426859	BCIN_13g04200	BC1G_12831	-
gene4358	64.2804	91.8594	36.7014	0.399539	-1.32359	0.000174161	0.00479173	BCIN_05g06250	BC1G_01749	-
gene2133	720.329	989.827	450.832	0.455466	-1.13458	0.000175667	0.00482017	BCIN_03g00290	BC1G_12522	-
gene9560	481.915	692.652	271.178	0.391507	-1.35289	0.000206634	0.00551408	BCIN_13g01300	BC1G_04342	-
gene7426	51.6816	74.0406	29.3225	0.396033	-1.33631	0.000220683	0.00582232	BCIN_09g06700	BC1G_07662	-
gene5588	77.3573	108.654	46.0607	0.423921	-1.23813	0.000229951	0.00600311	BCIN_07g02500	BC1G_02756	-
gene10385	60.4848	85.8844	35.0853	0.408518	-1.29153	0.000232108	0.0060129	BCIN_14g03730	BC1G_15967	-
gene5485	54.6957	77.273	32.1185	0.415649	-1.26656	0.000302708	0.00731575	BCIN_07g01470	BC1G_09740	-
gene11078	69.4402	96.954	41.9264	0.432436	-1.20944	0.000308202	0.00741745	BCIN_15g05130	BC1G_15777	-
gene861	74.2996	109.776	38.8236	0.353663	-1.49955	0.000322007	0.00762239	Bcpho89	BCIN_01g08640	BC1G_00047
gene8963	85.969	118.257	53.6811	0.453936	-1.13944	0.000338719	0.0079204	BCIN_12g02140	BC1G_03092	-
gene392	1180.74	1613.05	748.443	0.463993	-1.10782	0.000353869	0.00822461	BCIN_01g03950	BC1G_12192	-
gene6554	1532.9	2087.17	978.63	0.468879	-1.09271	0.000382453	0.00871327	BCIN_08g05060	BC1G_08866	-
gene6158	77.8986	124.011	31.7865	0.256321	-1.96398	0.000389271	0.00885111	BCIN_08g01080	BC1G_12736	-
gene6049	114.777	156.597	72.956	0.465883	-1.10196	0.000423798	0.0094681	BCIN_07g07120
gene8938	32.831	48.646	17.016	0.349791	-1.51543	0.000473021	0.0103669	BCIN_12g01890	BC1G_03050	-
gene527	111.512	149.384	73.6413	0.492968	-1.02043	0.000604695	0.0127907	BCIN_01g05300	BC1G_00498	-
gene3883	243.208	352.497	133.919	0.379914	-1.39626	0.000622548	0.0130501	BCIN_05g01500	BC1G_12454	-
gene7597	653.639	906.332	400.946	0.442383	-1.17663	0.000685904	0.0140947	BCIN_10g01270	BC1G_05105	-
gene338	1582.18	2149.26	1015.1	0.472304	-1.08221	0.00070937	0.0144226	Bcams1	BCIN_01g03390	BC1G_10523
gene5250	96.2727	129.606	62.9399	0.485626	-1.04208	0.00073065	0.0147226	BCIN_06g06730
gene11011	46.8124	66.1677	27.4571	0.414962	-1.26895	0.000743384	0.0148522	BCIN_15g04460	BC1G_12800	-
gene5564	288.962	389.756	188.169	0.482787	-1.05054	0.000789338	0.0154711	BCIN_07g02260	BC1G_02792	-
gene5563	91.4676	122.941	59.9944	0.487995	-1.03506	0.000801424	0.0156325	BCIN_07g02250	BC1G_02793	-
gene11465	74.3099	101.355	47.265	0.466332	-1.10057	0.000906004	0.0170105	BCIN_16g03230	BC1G_09238	-
gene9336	57.781	79.7233	35.8387	0.449538	-1.15348	0.00097374	0.0178783	BCIN_12g05870	BC1G_10163	-
gene5773	792.151	1233.67	350.631	0.284217	-1.81493	0.00113	0.0199462	BCIN_07g04350	BC1G_07278	-
gene1721	40.6853	58.472	22.8986	0.391616	-1.35249	0.00142744	0.0233744	BCIN_02g05550	BC1G_08073	-
gene1472	166.765	240.2	93.3305	0.388554	-1.36381	0.001528	0.024563	BCIN_02g03050	BC1G_14778	-
gene7111	226.728	339.734	113.721	0.334735	-1.57891	0.00172967	0.0269454	BCIN_09g03540	BC1G_09986	-
gene3127	417.288	573.383	261.192	0.455528	-1.13439	0.00204426	0.0304081	BCIN_04g00900	BC1G_06998	-
gene2609	79.9485	109.805	50.0924	0.456196	-1.13227	0.00233668	0.0332149	BCIN_03g05060	BC1G_00799	-
gene10040	54.4526	73.826	35.0792	0.475161	-1.07351	0.00253686	0.0352216	BCIN_14g00270	BC1G_13809	-
gene1467	46.9297	66.7262	27.1331	0.406633	-1.2982	0.00301475	0.0398555	BCIN_02g03000	BC1G_14772	-
gene5772	89.3362	123.312	55.3599	0.44894	-1.15541	0.00303389	0.039971	BCIN_07g04340	BC1G_07279	-
gene6590	48.5132	66.222	30.8044	0.465169	-1.10417	0.00327228	0.0421485	BCIN_08g05420	BC1G_08909	-
gene7280	11.9879	18.986	4.9897	0.262809	-1.92792	0.00348077	0.0438539	BCIN_09g05240	BC1G_09891	-
gene805	337.004	480.251	193.756	0.403448	-1.30954	0.00353041	0.0442657	BCIN_01g08080	BC1G_00118	-
gene4676	19.1244	28.4915	9.75724	0.342462	-1.54598	0.00379063	0.046735	BCIN_06g00990
gene812	1401.23	1872.55	929.906	0.496598	-1.00985	0.00393057	0.0481527	BCIN_01g08150
gene7814	522.347	819.75	224.944	0.274406	-1.86562	0.00440879	0.0524176	BCIN_10g03450	BC1G_11795	-
gene6161	39767.2	53242.8	26291.6	0.493806	-1.01798	0.00449768	0.0532554	Bchex	BCIN_08g01110	BC1G_12729
gene3859	11477.6	16936.5	6018.64	0.355366	-1.49262	0.00480874	0.0555471	BCIN_05g01260	BC1G_12426	-
gene163	242.654	337.16	148.148	0.4394	-1.18639	0.00493631	0.0563424	BCIN_01g01630	BC1G_05907	-
gene8227	21.3904	31.0891	11.6917	0.376072	-1.41092	0.00496293	0.0564784	BCIN_11g01320;end_range=452626,.	BC1G_03977;partial=true;start_range=.,451983	-
gene10334	31.2855	43.7002	18.8709	0.431825	-1.21148	0.00503578	0.0571383	BCIN_14g03210	BC1G_10081	-
gene9131	10.8802	17.1681	4.59222	0.267485	-1.90247	0.00539142	0.0599347	BCIN_12g03820	BC1G_08703	-
gene11578	54.3886	82.1146	26.6626	0.3247	-1.62282	0.00541871	0.0601014	BCIN_16g04360	BC1G_12358	-
gene10806	277.413	411.746	143.08	0.347496	-1.52493	0.00549715	0.0607003	Bcbas1	BCIN_15g02400	BC1G_14159
gene1769	90.8942	131.051	50.7378	0.387162	-1.36899	0.00561315	0.0615684	BCIN_02g06030	BC1G_14934	-
gene1340	664.939	1002.04	327.84	0.327173	-1.61187	0.00599278	0.0641015	BCIN_02g01730	BC1G_02580	-
gene7365	400.431	575.821	225.041	0.390817	-1.35543	0.00605645	0.0643491	BCIN_09g06090	BC1G_09446	-
gene6490	575.341	769.956	380.725	0.494477	-1.01603	0.00653609	0.0676966	Bcisn1	BCIN_08g04420	BC1G_08782
gene2289	212.084	294.855	129.313	0.438564	-1.18914	0.00655245	0.0677383	BCIN_03g01860
gene1473	1502.82	2156.29	849.351	0.393894	-1.34412	0.0067004	0.0685987	BcppoA80	BCIN_02g03060	BC1G_14780
gene992	14563.7	20586	8541.43	0.414915	-1.26911	0.00717466	0.0722353	BCIN_01g09950	BC1G_05327	-
gene2167	43.4884	58.3499	28.6268	0.490606	-1.02736	0.00722428	0.0726081	BCIN_03g00640	BC1G_02144	-
gene1893	81.9627	118.743	45.1823	0.380505	-1.39401	0.00739715	0.0737668	BCIN_02g07280	BC1G_13525	-
gene6454	1510.41	2048.22	972.595	0.47485	-1.07446	0.00770848	0.0761469	BCIN_08g04060	BC1G_07572	-
gene548	575.453	796.016	354.889	0.445832	-1.16543	0.00814399	0.0786957	Bcctr2	BCIN_01g05510	-
gene1892	26.2385	36.5756	15.9013	0.434752	-1.20173	0.00829906	0.0795936	BCIN_02g07270	BC1G_13526	-
gene11617	94.8182	128.357	61.2796	0.477416	-1.06668	0.00912736	0.0850863	Bclas21	BCIN_16g04760	BC1G_10730
gene2463	206.661	289.004	124.319	0.430165	-1.21704	0.00918536	0.0854631	BCIN_03g03600	BC1G_00591	-
gene3815	1031.4	1380.56	682.248	0.494183	-1.01688	0.00984673	0.0896628	Bccdc20	BCIN_05g00810	BC1G_09400
gene3455	6086.95	8542.14	3631.76	0.425157	-1.23393	0.00988866	0.0898772	BCIN_04g04190	BC1G_04151	-
gene2834	1447.43	2133.63	761.237	0.35678	-1.48689	0.0100535	0.0911135	BCIN_03g07320	BC1G_11698	-
gene10589	95.5352	129.094	61.9766	0.48009	-1.05862	0.0104761	0.0936194	BCIN_15g00220	BC1G_12388	-
gene8972	40.8833	54.5462	27.2205	0.499037	-1.00278	0.010657	0.094649	BCIN_12g02230	BC1G_03102	-
gene6241	29.1665	39.8829	18.4502	0.46261	-1.11213	0.0111574	0.0978122	Bcysa1	BCIN_08g01910	BC1G_07853
gene5736	4471.42	6325.06	2617.78	0.413874	-1.27274	0.0112995	0.0984587	BCIN_07g03980	BC1G_14469	-
gene9517	422.597	580.805	264.39	0.455213	-1.13539	0.0114578	0.0993126	BCIN_13g00870	BC1G_04401	-
gene7887	186.706	288.291	85.121	0.295261	-1.75994	0.0127038	0.106509	BCIN_10g04180
gene5114	62.3522	84.4703	40.2342	0.476312	-1.07002	0.013339	0.110373	BCIN_06g05370	BC1G_02278	-
gene3633	28.018	38.439	17.5971	0.457792	-1.12724	0.0133562	0.110373	BCIN_04g05970	BC1G_03851	-
gene9411	92.481	124.458	60.5038	0.486138	-1.04056	0.0140607	0.11431	BCIN_12g06600	BC1G_13857	-
gene9848	37.0307	49.4694	24.5921	0.497118	-1.00834	0.0142498	0.115145	BCIN_13g04210	BC1G_12830	-
gene3481	563.019	756.781	369.257	0.487931	-1.03525	0.0144248	0.116124	BCIN_04g04450	BC1G_04181	-
gene2072	7.39146	11.8449	2.93803	0.248043	-2.01134	0.0144718	0.116345	BCIN_02g09080
gene3934	25.2575	34.6369	15.8782	0.458418	-1.12527	0.0145639	0.116669	BCIN_05g02010	BC1G_13089	-
gene1206	14.8619	21.3885	8.33528	0.389709	-1.35953	0.0153715	0.120546	BCIN_02g00390	BC1G_05536	-
gene11560	139.657	201.749	77.5658	0.384467	-1.37907	0.0157707	0.122429	BCIN_16g04180	BC1G_13474	-
gene3691	25.0249	34.1236	15.9263	0.466723	-1.09936	0.0160387	0.12351	BCIN_04g06550	BC1G_03934	-
gene2549	489.789	696.232	283.346	0.406971	-1.297	0.0168503	0.12721	BCIN_03g04460	BC1G_00709	-
gene5878	13.1531	19.3509	6.95521	0.359426	-1.47623	0.0176313	0.130864	BCIN_07g05410	BC1G_09302	-
gene9646	119.127	159.772	78.4822	0.491213	-1.02558	0.0179267	0.132373	BCIN_13g02160	BC1G_06029	-
gene11367	10.7896	16.1588	5.42042	0.335447	-1.57584	0.0186927	0.136645	BCIN_16g02250	BC1G_08168	-
gene7195	67.9858	97.8617	38.1099	0.389426	-1.36058	0.0191488	0.138313	BCIN_09g04390	BC1G_12147	-
gene4189	11.0663	16.3943	5.73831	0.350018	-1.5145	0.0196992	0.140094	BCIN_05g04560
gene887	239.021	325.578	152.465	0.46829	-1.09453	0.0197934	0.140457	BCIN_01g08900	BC1G_00004	-
gene5664	45.5908	63.0617	28.12	0.445913	-1.16517	0.0203961	0.143196	BCIN_07g03260	BC1G_02660	-
gene6871	1434	1976.16	891.842	0.4513	-1.14784	0.0204793	0.143343	BCIN_09g01110	BC1G_14702	-
gene11460	2414.41	3343.75	1485.07	0.444134	-1.17093	0.0206474	0.143734	BCIN_16g03180	BC1G_09232	-
gene1345	41.3043	66.9486	15.66	0.233911	-2.09597	0.0209877	0.145313	BCIN_02g01780	BC1G_02575	-
gene569	7071.12	9752.79	4389.44	0.450071	-1.15178	0.0210509	0.145488	BCIN_01g05720	BC1G_00448	-
gene6862	298.924	419.175	178.672	0.426247	-1.23024	0.0210894	0.145667	BCIN_09g01020	BC1G_14716	-
gene3858	1070.7	1603.59	537.811	0.33538	-1.57613	0.0212995	0.146416	BCIN_05g01250	BC1G_12425	-
gene164	3.04445	5.72291	0.365996	0.0639527	-3.96685	0.0217285	0.148392	BCIN_01g01640	BC1G_05908	-
gene3386	38.1571	51.1471	25.1671	0.492054	-1.02311	0.0220412	0.149378	BCIN_04g03500;end_range=1268272,.	BC1G_14296;partial=true;start_range=.,1267762	-
gene2260	85.1523	123.642	46.6625	0.377399	-1.40584	0.022105	0.149458	BCIN_03g01570	BC1G_02017	-
gene1339	1477.27	1991.18	963.353	0.48381	-1.04749	0.0221831	0.149548	BCIN_02g01720	BC1G_02581	-
gene10730	109.038	145.974	72.1029	0.493944	-1.01758	0.0225944	0.151171	BCIN_15g01630
gene9354	31.8073	42.7254	20.8893	0.48892	-1.03233	0.0231916	0.153123	BCIN_12g06030	BC1G_10133	-
gene6361	4510.13	6067.94	2952.32	0.486544	-1.03936	0.0232486	0.153261	CND17	BCIN_08g03110	BC1G_06815
gene8276	353.931	483.814	224.048	0.463087	-1.11065	0.0237024	0.155184	BCIN_11g01810	BC1G_04040	-
gene298	645.68	873.21	418.15	0.478865	-1.06231	0.0239259	0.156136	BCIN_01g02970	BC1G_11826	-
gene8548	3.45436	6.25632	0.652402	0.104279	-3.26148	0.0239476	0.156136	BCIN_11g04540;end_range=1680312,.	BC1G_03321;partial=true;start_range=.,1678767	-
gene2591	143.507	201.535	85.4791	0.424141	-1.23738	0.0240405	0.156311	BCIN_03g04880	BC1G_00776	-
gene5447	1059.94	1445.09	674.794	0.466956	-1.09864	0.0245878	0.158911	BCIN_07g01090	BC1G_09789	-
gene2403	3.99002	6.86542	1.11461	0.162351	-2.62281	0.0246705	0.159329	BCIN_03g03000	BC1G_06503	-
gene4492	92.7417	129.022	56.4617	0.437614	-1.19227	0.0258528	0.164026	BCIN_05g07600	BC1G_11072	-
gene795	11.194	16.627	5.76101	0.346486	-1.52913	0.0262684	0.165567	BCIN_01g07980
gene1551	63.869	96.8842	30.8538	0.318461	-1.65081	0.0263657	0.165908	BCIN_02g03840	BC1G_07976	-
gene4173	306.061	496.947	115.176	0.231767	-2.10925	0.0264381	0.166182	BCIN_05g04400	BC1G_01337	-
gene7196	13.8603	24.839	2.88162	0.116012	-3.10765	0.026672	0.167374	Bccat7	BCIN_09g04400	BC1G_12146
gene1558	422.572	625.218	219.925	0.351757	-1.50735	0.0275514	0.170831	BCIN_02g03910
gene707	11.0801	17.8792	4.28088	0.239433	-2.06231	0.027907	0.172039	Bcctr1	BCIN_01g07100	BC1G_00262
gene6045	443.174	602.159	284.189	0.471951	-1.08329	0.0285345	0.174489	BCIN_07g07080	BC1G_11306	-
gene3850	3.97429	6.89039	1.05819	0.153575	-2.70298	0.0290379	0.176305	BCIN_05g01170	BC1G_15178	-
gene8992	1609.77	2270.85	948.701	0.417774	-1.2592	0.0291656	0.176586	BCIN_12g02430	BC1G_03131	-
gene11579	171.52	233.432	109.608	0.469548	-1.09066	0.0294304	0.17791	BCIN_16g04370	BC1G_12357	-
gene11079	221.203	320.446	121.959	0.380592	-1.39368	0.0301735	0.180139	BCIN_15g05140	BC1G_15776	-
gene4426	22.7367	30.6552	14.8182	0.483383	-1.04876	0.0306902	0.181786	BCIN_05g06940	BC1G_13239	-
gene11557	44.4811	64.7399	24.2222	0.374147	-1.41832	0.0317367	0.185434	BCIN_16g04150	BC1G_13479	-
gene7888	146.153	215.78	76.5263	0.354649	-1.49553	0.0324532	0.187435	BCIN_10g04190	BC1G_03729	-
gene6255	19.083	26.2984	11.8675	0.451264	-1.14796	0.032746	0.187757	BCIN_08g02050	BC1G_07828	-
gene11289	572.142	763.012	381.272	0.499693	-1.00089	0.0327532	0.187757	Bcrny1	BCIN_16g01470	BC1G_15832
gene9387	25.6531	34.7917	16.5144	0.474665	-1.07502	0.0329794	0.188211	BCIN_12g06360	BC1G_10091	-
gene6727	11.0145	16.0125	6.0164	0.375731	-1.41223	0.033566	0.190053	BCIN_08g06790	BC1G_11443	-
gene6662	168.138	235.542	100.733	0.427663	-1.22545	0.0340746	0.191616	BCIN_08g06140	BC1G_11014	-
gene6672	201.082	287.076	115.088	0.400899	-1.31869	0.0350193	0.194513	BCIN_08g06240	BC1G_11002	-
gene4947	33.1462	44.9702	21.3222	0.474141	-1.07661	0.0353656	0.195972	BCIN_06g03700	BC1G_05662	-
gene6157	43.2955	66.685	19.9059	0.298506	-1.74417	0.0360543	0.197903	BCIN_08g01070	BC1G_12738	-
gene5	2416.84	3360.97	1472.71	0.438178	-1.19041	0.0361277	0.197947	Bcboa6	BCIN_01g00060	BC1G_16087
gene10124	18.7436	25.262	12.2252	0.483938	-1.0471	0.036299	0.198602	BCIN_14g01110	BC1G_15334	-
gene1305	18.2387	24.9465	11.5308	0.462221	-1.11334	0.0371125	0.201144	BCIN_02g01380	BC1G_02628	-
gene7614	9.37453	13.7427	5.00632	0.364288	-1.45685	0.0391987	0.208145	BCIN_10g01450	BC1G_05084	-
gene701	34.5351	46.4265	22.6437	0.487731	-1.03584	0.0397535	0.209739	BCIN_01g07040	BC1G_00269	-
gene4441	50.6331	67.5757	33.6904	0.498557	-1.00417	0.0404248	0.211984	BCIN_05g07090	BC1G_13258	-
gene79	1712.38	2473.75	951.014	0.384442	-1.37916	0.0414326	0.214493	Bclcc8	BCIN_01g00800	BC1G_14349
gene9694	12.9946	18.2307	7.75848	0.425573	-1.23252	0.0414361	0.214493	BCIN_13g02640	BC1G_05961	-
gene2303	12.0425	17.0816	7.00332	0.409991	-1.28634	0.0426962	0.21811	BCIN_03g02000	BC1G_01954	-
gene8994	4248.19	6085.19	2411.19	0.39624	-1.33556	0.0431377	0.219652	Bcbio2	BCIN_12g02450	BC1G_03133
gene1899	14.3563	19.7267	8.98592	0.455522	-1.13441	0.0436095	0.22098	BCIN_02g07340	BC1G_13516	-
gene8163	9.25001	13.429	5.07104	0.377619	-1.405	0.0448996	0.223807	BCIN_11g00680	BC1G_15461	-
gene11242	1139.05	1537.88	740.218	0.481323	-1.05492	0.045019	0.224144	CND8	BCIN_16g01000	BC1G_10388
gene567	4.67979	7.55277	1.80681	0.239224	-2.06356	0.0464698	0.227952	BCIN_01g05700	BC1G_00452	-
gene1534	78.1946	113.821	42.5679	0.373989	-1.41893	0.0464882	0.227952	BCIN_02g03670	BC1G_07996	-
gene10008	18.9044	25.4	12.4089	0.488538	-1.03346	0.0467516	0.228687	Bcstc3	BCIN_13g05830	BC1G_06357
gene8993	598.335	854.73	341.939	0.400055	-1.32173	0.0478557	0.231798	BCIN_12g02440	BC1G_03132	-
gene9190	183.28	246.337	120.223	0.488043	-1.03492	0.0479549	0.231889	BCIN_12g04410	BC1G_15643	-
gene2425	10.5967	15.2566	5.93681	0.38913	-1.36168	0.0494184	0.235703	BCIN_03g03220	BC1G_00533	-
gene688	118.62	186.31	50.9289	0.273355	-1.87115	0.0497373	0.236414	BCIN_01g06910	BC1G_00286	-
gene8357	31.2246	44.3502	18.0991	0.408094	-1.29303	0.0499733	0.236978	Bchol1	BCIN_11g02620	BC1G_04779
